# Supplementary material for: In vitro and in vivo effects of zoledronic acid on senescence and senescence-associated secretory phenotype markers
Source: publisher site journal article supplement (doi:10.18632/aging.204701), 2023-05-07
Supplement: Supplementary file [file aging-v15i9-204701-supplementary-material-SD2.pdf]

## SUPPLEMENTARY TABLE

**Supplementary Table 1. Antibodies used for CyTOF, conjugated metals, supplier and identification numbers.**

| Reagent         | Conjugated metal | Source         | Identifier   |
|-----------------|------------------|----------------|--------------|
| Hematopoietic   |                  |                |              |
| CD45            | 089Y             | Fluidigm       | 3089005B     |
| Stem/Progenitor |                  |                |              |
| CD34            | 163Dy            | Thermo Fisher  | MA5-17826    |
| Emcn            | 164Dy            | ThermoFisher   | 14-5851-82   |
| CD117           | 173Yb            | FDM            | 3173004B     |
| Granulocytes    |                  |                |              |
| CD11b           | 111Cd            | Biolegend      | 101201       |
| Macrophage      |                  |                |              |
| F4-80           | 113Cd            | Biolegend      | 123101       |
| CX3CR1          | 161Dy            | Biolegend      | 149002       |
| Monocytes       |                  |                |              |
| Ly6C            | 141Pr            | Biolegend      | 128039       |
| CD11c           | 142Nd            | FDM            | 3142003B     |
| CCR2            | 156Gd            | Novus          | MAB55381-100 |
| CD115           | 174Yb            | Biolegend      | 135521       |
| CD14            | 165Ho            | Biolegend      | 123321       |
| T cells         |                  |                |              |
| CD4             | 145Nd            | FDM            | 3145002B     |
| CD3e            | 152Sm            | FDM            | 3152004B     |
| CD8a            | 168Er            | FDM            | 3168003B     |
| Osteoclasts     |                  |                |              |
| Ctsk            | 147Sm            | abcam          | ab37259      |
| ACP5            | 151Eu            | Abcam          | ab83050      |
| B cells         |                  |                |              |
| CD45R           | 153Eu            | Biolegend      | 103249       |
| Neutrophils     |                  |                |              |
| Catalase        | 158Gd            | Abcam          | ab223793     |
| Ly6G            | 170Er            | Biolegend      | 127637       |
| B cells         |                  |                |              |
| CD19            | 166Er            | FDM            | 3166015B     |
| BMSCs           |                  |                |              |
| Ly-6A           | 169Tm            | FDM            | 3169015B     |
| SASP            |                  |                |              |
| IL-1 $\alpha$   | 171Yb            | Biolegend      | 503202       |
| IL-1 $\beta$    | 159Tb            | Cell Signaling | 31202        |
| CXCL1           | 175Lu            | R&D Systems    | MAB453-500   |
| pNFkB           | 110Cd            | Abcam          | ab16502      |
| MCP-1           | 149Sm            | Thermo Fisher  | MA5-17040    |
| PAI-1           | 160Gd            | Abcam          | ab125687     |
| IL-6            | 167Er            | FDM            | 3167003B     |
| Senescence      |                  |                |              |
| p53             | 116Cd            | Abcam          | ab252388     |
| p16             | 155Gd            | Abcam          | ab232402     |
| p21             | 176Yb            | Santa Cruz     | sc-6246      |
| DNA Damage      |                  |                |              |
| pATM            | 114Cd            | Invitrogen     | 14-0146-82   |
